# Supplementary material
Source: PubMed Central journal article supplement (PMC3870736)
Supplement: 1310201110_pnas.201310201SI.pdf [file 1310201110_pnas.201310201SI.pdf]

# Supporting Information

Monnier et al. 10.1073/pnas.1310201110

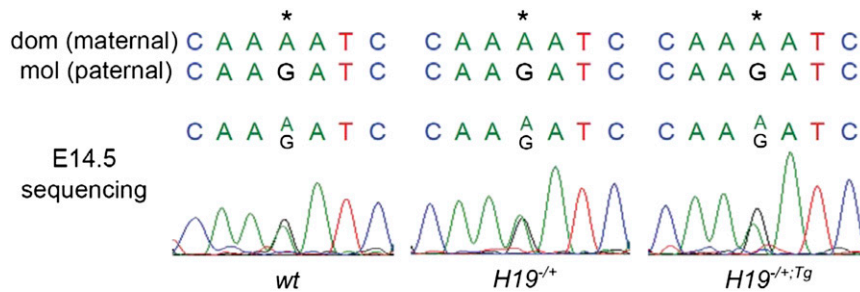

**Fig. S1.** *Dcn* is not imprinted in E14.5 limb muscles. Allele-specific expression analysis of *Dcn* detected by RT-PCR and sequencing in WT, *H19*<sup>-/-</sup>, and *H19*<sup>-/-;Tg</sup> E14.5 limb muscle samples. Maternal (*dom*, *domesticus*) and paternal (*mol*, *molossinus*) sequences are indicated. Stars indicate polymorphisms between the *domesticus* and *molossinus* alleles.

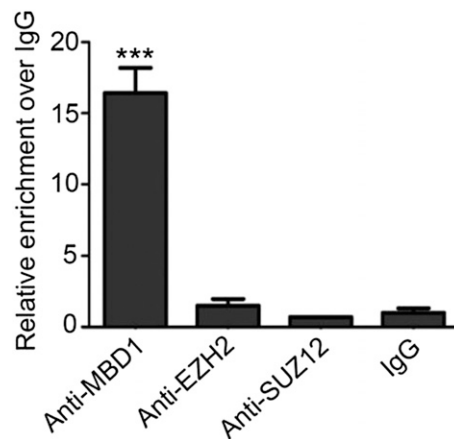

**Fig. S2.** RNA immunoprecipitation (RIP) analysis. RNA immunoprecipitation with an antibody to MBD1, EZH2, and SUZ12 indicate binding to *H19* in WT mouse embryo fibroblasts. The enrichment of RNA over a random IgG, measured by RT-qualitative PCR (qPCR), is shown.



**Table S2. Primer sequences**

|                                   | Forward                 | Reverse                  |
|-----------------------------------|-------------------------|--------------------------|
| <b>ChIP and RIP</b>               |                         |                          |
| <i>Igf2</i> DMR                   | TGGATTTTGCAATTGGTGTC    | TGGCCAAGTCCTTTTCTTT      |
| <i>Cdkn1c</i> DMR                 | AGGGAGTCTAAAGGGCTGGT    | TTGAACACGGTCTGTGGAAA     |
| <i>Slc38a4</i> DMR                | GGGAACTGACCGTGGAGTA     | GCCTTTTCAGCTGTCTGTCC     |
| <i>Peg1</i> DMR                   | AGGATGGGCGGGTTAGAG      | AGAAGAAGCACCGGGATGT      |
| <i>H19</i> RNA                    | GGAGACTAGGCCAGGTCTC     | GCCCATGGTGTTCAGAAGGC     |
| <i>Igf2</i> mRNA                  | GGTGCTTCTCATCTCTTTGG    | CGACGGTTGGCACGGCTTGA     |
| <b>RT-qPCR</b>                    |                         |                          |
| <i>H19</i>                        | GGAGACTAGGCCAGGTCTC     | GCCCATGGTGTTCAGAAGGC     |
| <i>Igf2</i>                       | GGTGCTTCTCATCTCTTTGG    | CGACGGTTGGCACGGCTTGA     |
| <i>Cdkn1c</i>                     | AACTCCAGCAGGATGTGCC     | CATCCACTGCAGACGACCAG     |
| <i>Slc38a4</i>                    | ACTGTGGCAATACTCTCGCTCTA | ATCCAAATGCTTTCTGCCCAAT   |
| <i>Dcn</i>                        | CATCTTCGAGTGGTGCAAGTGT  | GCAGGTCTAGCAAGGTTGTGC    |
| <i>Gtl2</i>                       | CGAGGACTTCACGCACAACAC   | CCACGCAGGATTCAGATGATG    |
| <i>Dlk1</i>                       | ACTTGCGTGGACCTGGAGAA    | CTGTTGGTTGCGGCTACGAT     |
| <i>Mbd1</i>                       | AACTGAGCTCTCCCTTAAAGG   | TGACTGCTGCCACTCCTCTG     |
| <i>Peg1</i>                       | CAACAATGACGGCAACCTGGT   | TCTGAATTTCTTCTTTGATTAAT  |
| <i>Igf2r</i>                      | GCACAGAATCCAGACTAGCATT  | CCTCCTTATCAGCTTTAAATAT   |
| <i>Gnas</i>                       | AGCGCGAGGCCAACAAAA      | GTGCGTGGCCCCGGTAGA       |
| <i>Sdha</i>                       | TTCCGTGTGGGGAGTGTATTGC  | AGGTCTGTGTTCCAAACCATTCC  |
| <i>Tfr</i>                        | GCAGATGAAGAAGAAAATGCCG  | TTACAATAGCCCAGGTAGCCACTC |
| <i>Actb</i>                       | TATTGGCAACGAGCGGTTCC    | GGCATAGAGGTCTTACGGATGTC  |
| <i>Igf2</i> intron 1              | CCACTTTGTGTGCACTCTGC    | TCTACACTCGCTTCCCCAAG     |
| <i>Peg1</i> intron 1              | GACGTGGGTCGTGTAGGTTT    | CAAATGGGGCTGCAATTACT     |
| <i>Slc38a4</i> intron 1           | GGTCTCGGAACTGTGTAGGG    | CCTGCCCTGGTTTACTTCAC     |
| <b>Allele-specific expression</b> |                         |                          |
| <i>Igf2</i>                       | GGAGATGTCCAGCAACCATC    | CTGAAGCAATGACATGCCAC     |
| <i>Peg1</i>                       | GATTCGCAACAATGACGGC     | ATCCAGAATCGACACTGTGG     |
| <i>Dcn</i>                        | GATTTTCCACCCGACACAAC    | TCTCCAGGAACTTCGTGTCC     |
| <i>Slc38a4</i>                    | ACACGGGATGGAGTTCAGAC    | ATCGGTGCTGTGTGAATGAA     |
| <i>Dlk1</i>                       | CGTCTTCTCAACAAGTGCG     | AGATCTCCTCATCACCAGCC     |
| <i>Gtl2</i>                       | TTGCACATTTCTGTGGGAC     | AAGCACCATGAGCCACTAGG     |
| <i>Cdkn1c</i>                     | GACGATGGAAGAACTCTGGG    | AGCGTACTCCTTGCACATGG     |
